# Supplementary material for: Gallic Acid Treats Hypertrophic Scar in Rabbit Ears via the TGF-β/Smad and TRPC3 Signaling Pathways
Source: MDPI journal article supplement (doi:10.3390/ph16111514), 2023-10-24
Supplement: s1 [file pharmaceuticals-2567349-supplementary.pdf › pharmaceuticals-2567349-supplementary.pdf]

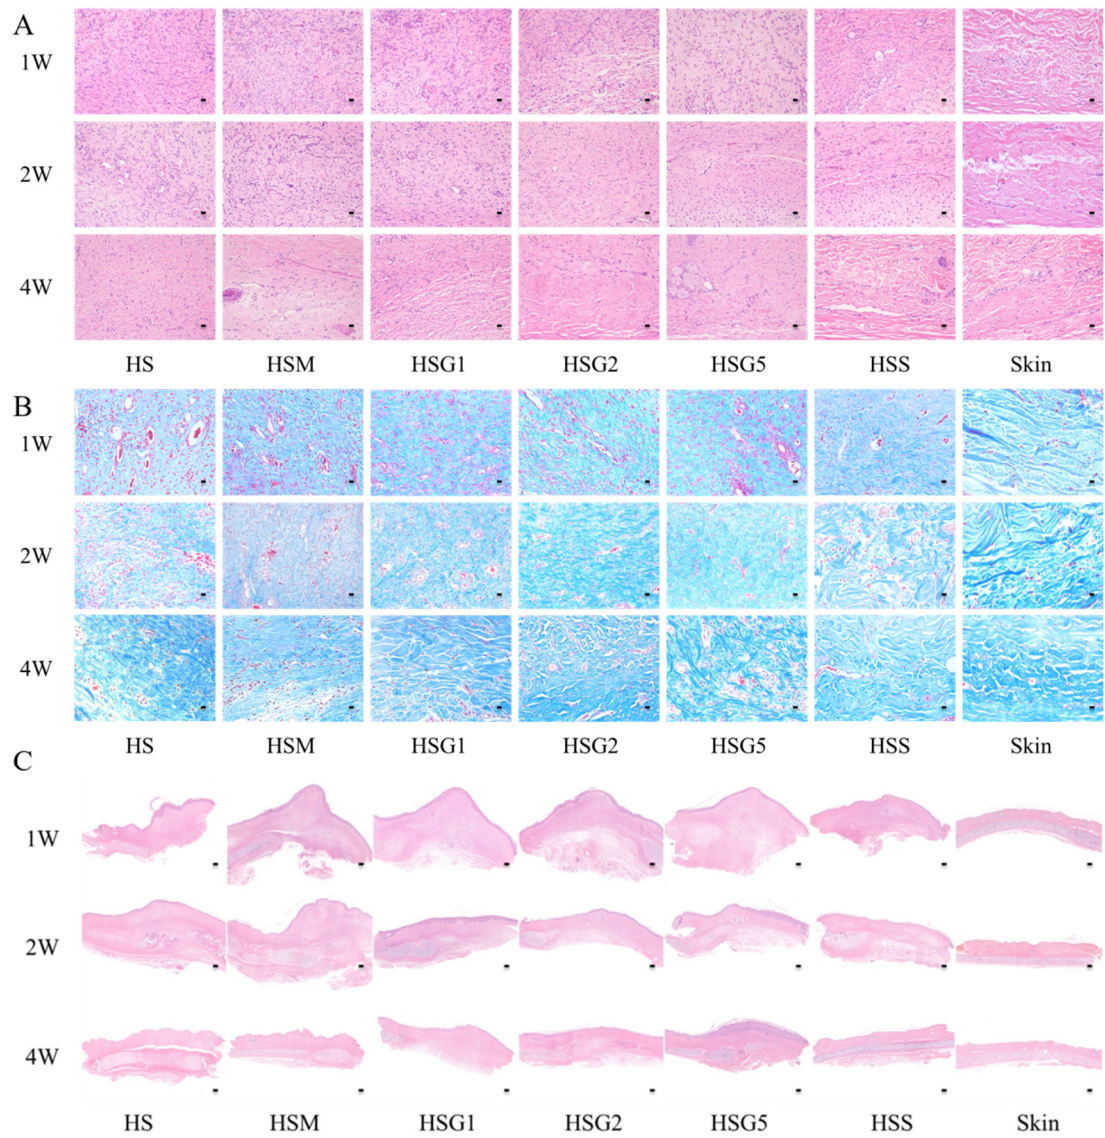

**Supplementary Figure S1. Histological staining of all groups after the treatments.** (HS: Model group, HSM: Matrix group, HSG1: Low-dose GA ointment group, HSG2: Medium-dose GA ointment group, HSG5: High-dose GA ointment group, HSS: Silicone gel group, Skin: Normal skin group)

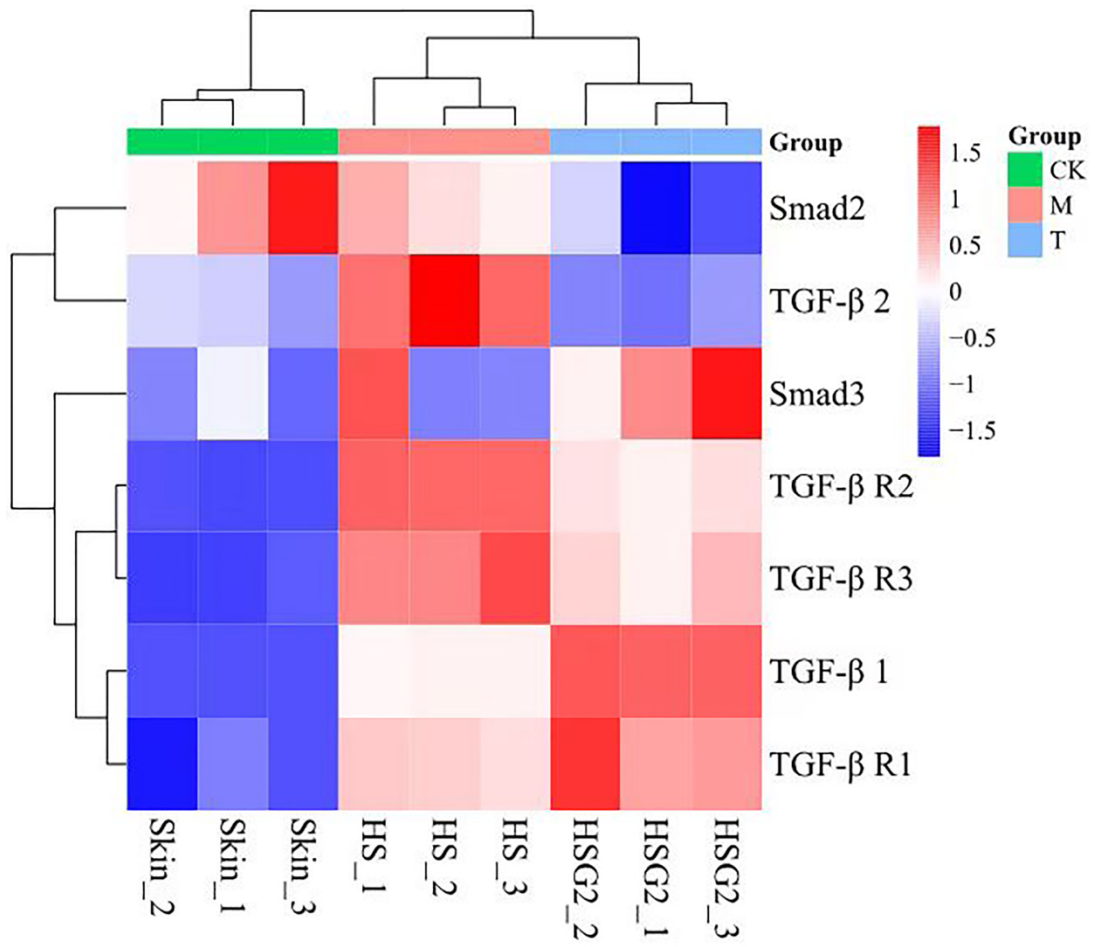

Supplementary Figure S2. Gene expression between the skin, HS and HSG2 groups.

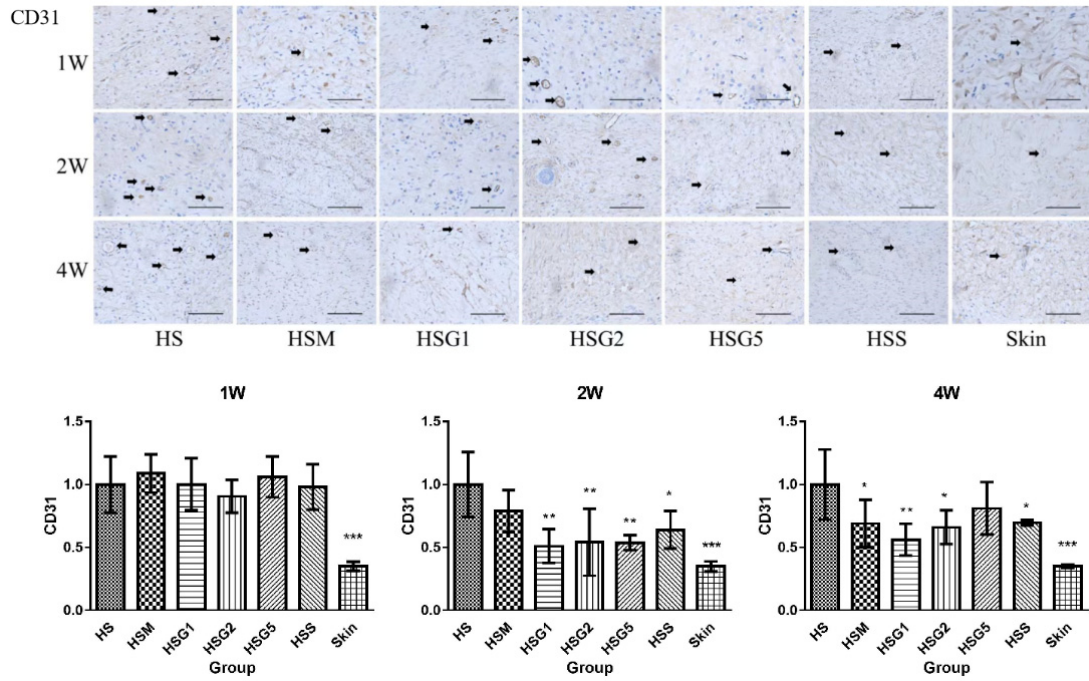

**Supplementary Figure S3. Immunohistochemical staining for CD31+ blood vessels in different groups.** Black arrow: microvascular vessel; Magnification = 200; Bar =100  $\mu$ m. Significant difference between HS group and other groups (\*p < 0.05, \*\*p < 0.01, n = 3); Significant difference between HSM group and other groups (#p < 0.05, ##p < 0.01, n = 3). Data was analyzed using one-way ANOVA with post-hoc Tukey's multiple comparisons test. (HS: Model group, HSM: Matrix group, HSG1: Low-dose GA ointment group, HSG2: Medium-dose GA ointment group, HSG5: High-dose GA ointment group, HSS: Silicone gel group, Skin: Normal skin group.)

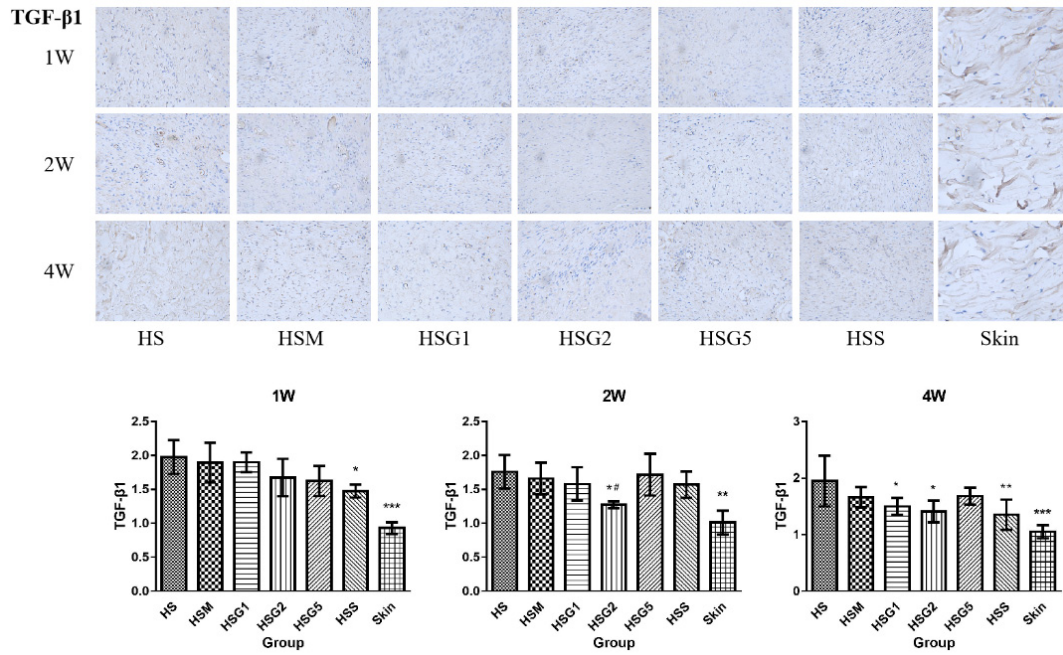

**Supplementary Figure S4. Immunohistochemical staining for TGF-β1 in different groups.**

Significant difference between HS group and other groups (\* $p < 0.05$ , \*\* $p < 0.01$ ,  $n = 3$ ); Significant difference between HSM group and other groups (# $p < 0.05$ , ## $p < 0.01$ ,  $n = 3$ ). Data was analyzed using one-way ANOVA with post-hoc Tukey's multiple comparisons test. (HS: Model group, HSM: Matrix group, HSG1: Low-dose GA ointment group, HSG2: Medium-dose GA ointment group, HSG5: High-dose GA ointment group, HSS: Silicone gel group, Skin: Normal skin group.)

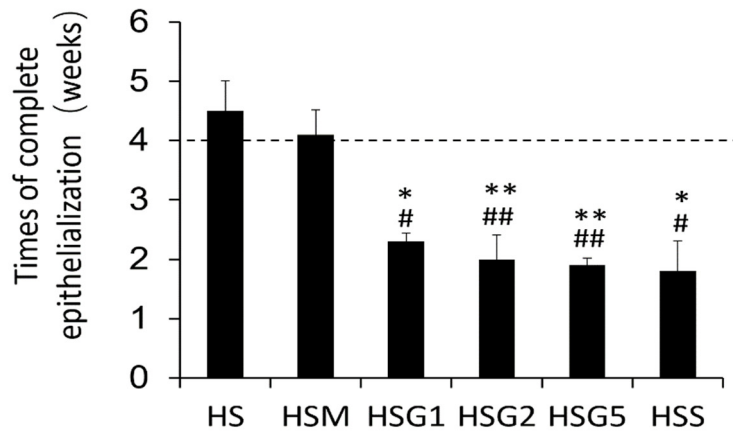

**Supplementary Figure S5. HSG significantly decreased complete wound-epithelialization time.** Significant difference between HS group and other groups (\* $p < 0.05$ , \*\* $p < 0.01$ ,  $n = 9$ ); Significant difference between HSM group and other groups (# $p < 0.05$ , ## $p < 0.01$ ,  $n = 9$ ). Data was analyzed using one-way analysis of variance ANOVA with post-hoc Tukey's multiple comparisons test. (HS: Model group, HSM: Matrix group, HSG1: Low-dose GA ointment group, HSG2: Medium-dose GA ointment group, HSG5: High-dose GA ointment group, HSS: Silicone gel group, Skin: Normal skin group.)



**Supplementary Table 1. Primer sequence information.**

| Gene           | Sequence (5'-3')                                                  | Annealing Temperature, °C | Product Size, bp |
|----------------|-------------------------------------------------------------------|---------------------------|------------------|
| TGF- $\beta$ 1 | Forward: CCCAAGTGATGATGAGGTGC<br>Reverse: CCTTGCCAAAGAAGCCTGAG    | 60                        | 134              |
| Smad2          | Forward: TACTGTCCAATGTGAACCGAAAC<br>Reverse: AGGGTGCCAGCCGTATCTC  | 60                        | 167              |
| Smad3          | Forward: CATTCCATCCCCGAGAACAC<br>Reverse: GCTGTGGTTCATCTGGTGGTC   | 60                        | 126              |
| TRPC3          | Forward: TTCATTGAGTCGTGTCAAACCTTG<br>Reverse: ACACTTGATGGCCACGGTC | 60                        | 139              |
| $\beta$ -actin | Forward: TGACCAACTGGGACGACATG<br>Reverse: GTGTTGAACGTCTCGAACATGA  | 60                        | 160              |
